# Supplementary material for: MHCII Expression on Peripheral Blood Monocytes in Canine Lymphoma: An Impact of Glucocorticoids
Source: MDPI journal article supplement (doi:10.3390/ani12162135), 2022-08-19
Supplement: s1 [file s1]

**Table 1.** Clinical databases for glucocorticosteroid (GC) administration in the dogs

| <b>Breed</b>           | <b>GC</b>                     | <b>Period of GC Administration before Blood Collection</b> |                                   |
|------------------------|-------------------------------|------------------------------------------------------------|-----------------------------------|
| mixed breed            | dexamethasone                 | 4 <sup>th</sup> , 3 <sup>rd</sup> , 2 <sup>nd</sup> day    |                                   |
| mixed breed            | prednisone                    | 7 days                                                     |                                   |
| mixed breed            | dexamethasone                 | 5 <sup>th</sup> day                                        |                                   |
| mixed breed            | dexamethasone /<br>prednisone | *                                                          | < 10 <sup>th</sup> day and 5 days |
| mixed breed            | prednisone                    | 3 days                                                     |                                   |
| Rottweiler             | methylprednisolone            | 7 <sup>th</sup> , 6 <sup>th</sup> , 5 <sup>th</sup> days   |                                   |
| German Shepherd        | dexamethasone                 | 8 <sup>th</sup> and 5 <sup>th</sup> days                   |                                   |
| English Cocker Spaniel | dexamethasone                 | * < 1 <sup>st</sup> day                                    |                                   |

\* these dogs have been receiving GC before these days but no specific data about administration schedule are known
